# Supplementary material for: Leveraging the Fragment Molecular Orbital Method to Explore the PLK1 Kinase Binding Site and Polo-Box Domain for Potent Small-Molecule Drug Design
Source: MDPI journal article supplement (doi:10.3390/ijms242115639), 2023-10-27
Supplement: s1 [file s1]

## Leveraging the Fragment Molecular Orbital Method to Explore the PLK1 Kinase Binding Site and Polo-Box Domain for Potent Small-Molecule Drug Design

Haiyan Jin<sup>2\*</sup>, Jongwan Kim<sup>1,3\*</sup>, Onju Lee<sup>2</sup>, Hyein Kim<sup>3</sup>, and Kyoung Tai No<sup>1,2,3,4</sup>.

<sup>1</sup> Department of Biotechnology, Yonsei University, Seoul, Republic of Korea

<sup>2</sup> The Interdisciplinary Graduate Program in Integrative Biotechnology & Translational Medicine, Yonsei University, Incheon, Republic of Korea

<sup>3</sup> Bioinformatics and Molecular Design Research Center (BMDRC), Incheon, Republic of Korea

<sup>4</sup> Baobab AiBIO Co., Ltd., Incheon 21983, Republic of Korea

\* Co-first authors

\* Correspondence: Kyoung Tai No ([ktno@yonsei.ac.kr](mailto:ktno@yonsei.ac.kr)), Jongwan Kim ([jwkim@bmdrc.org](mailto:jwkim@bmdrc.org))

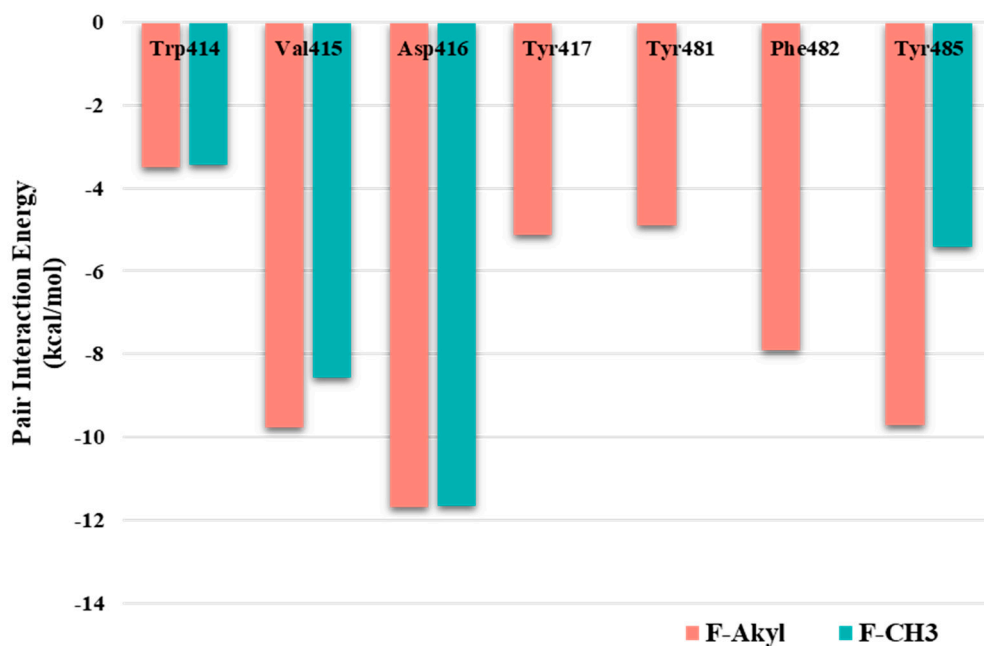

Figure S1. Comparison of F-Akyl with F-CH3 using pair interaction energy (PIE).



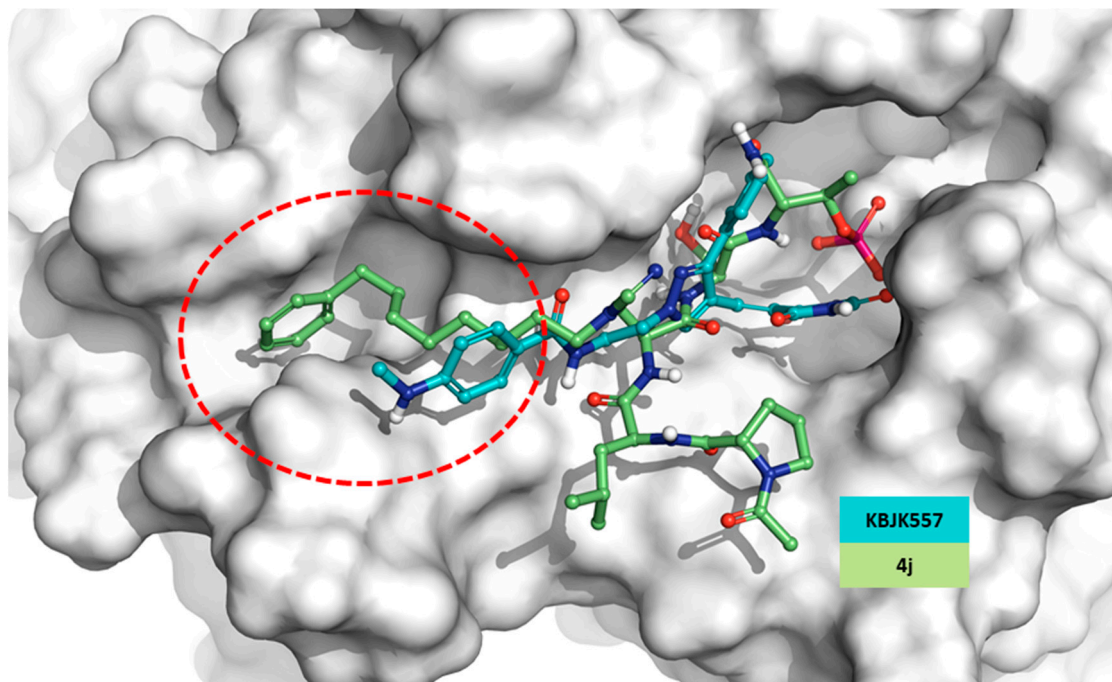

Figure S3. Superposition of 4a and KBJK557. Overlay representation of KBJK557 with 4j, where KBJK557 is light blue, 4j is light green, and the protein is presented with a white surface.

Table S1. PIEDA of ATP and PLK1 complex (PDB ID: 2OU7). All energies are in kcal/mol. The calculation was conducted at the FMO2/DFTB3/PCM level.

| Residue | $\Delta E^{\text{int}}$ | $\Delta E^{\text{es}}$ | $\Delta E^{\text{ex}}$ | $\Delta E^{\text{ct+mix}}$ | $\Delta E^{\text{di}}$ | $\Delta G_{\text{sol}}$ |
|---------|-------------------------|------------------------|------------------------|----------------------------|------------------------|-------------------------|
| Lys82   | -141.385                | -250.496               | 0.216                  | -0.555                     | -3.033                 | 112.484                 |
| Leu197  | -46.510                 | -12.336                | 0.271                  | -0.429                     | -2.375                 | -31.640                 |
| Gly196  | -43.174                 | -43.062                | 0.018                  | -0.182                     | -0.735                 | 0.788                   |
| Gly62   | -34.317                 | -28.590                | 0.312                  | -0.380                     | -1.764                 | -3.896                  |
| Arg136  | -26.851                 | -91.29                 | 0                      | 0                          | -0.895                 | 65.333                  |
| Arg134  | -17.438                 | -52.034                | 0.008                  | -0.001                     | -0.935                 | 35.524                  |
| Ala65   | -14.211                 | -21.054                | -0.006                 | -0.008                     | -0.945                 | 7.803                   |
| Cys133  | -10.425                 | -5.720                 | -0.370                 | -0.148                     | -2.375                 | -1.813                  |
| Leu59   | -9.960                  | -5.822                 | -0.060                 | -0.012                     | -1.960                 | -2.106                  |
| Val114  | -7.320                  | -7.105                 | -0.016                 | 0                          | -0.977                 | 0.779                   |
| Phe183  | -6.702                  | -1.999                 | -0.084                 | 0.016                      | -5.790                 | 1.155                   |
| Cys67   | -6.390                  | -7.198                 | -0.182                 | -0.045                     | -3.571                 | 4.606                   |
| Ala80   | -6.080                  | -7.014                 | 0.038                  | -0.003                     | -2.004                 | 2.903                   |
| Leu130  | -4.936                  | -4.423                 | -0.002                 | 0                          | -1.087                 | 0.576                   |

Table S2. PIEDA of BI2536 and PLK1 complex (PDB ID: 2RKU). All energies are in kcal/mol. The calculation was conducted at the FMO-MP2/6-31G\*\*/PCM level.

| Residue | $\Delta E^{\text{int}}$ | $\Delta E^{\text{es}}$ | $\Delta E^{\text{ex}}$ | $\Delta E^{\text{ct+mix}}$ | $\Delta E^{\text{di}}$ | $\Delta G_{\text{sol}}$ |
|---------|-------------------------|------------------------|------------------------|----------------------------|------------------------|-------------------------|
| Cys133  | -14.382                 | -15.497                | 12.292                 | -3.133                     | -7.068                 | -0.976                  |
| Gly60   | -14.095                 | -13.257                | 5.720                  | -2.618                     | -5.916                 | 1.976                   |
| Leu132  | -12.557                 | -7.003                 | 4.455                  | -2.848                     | -6.951                 | -0.21                   |
| Arg136  | -11.995                 | -7.929                 | 4.386                  | -2.637                     | -9.238                 | 3.423                   |
| Leu59   | -8.796                  | -1.082                 | 7.484                  | -2.854                     | -12.121                | -0.223                  |
| Phe183  | -8.170                  | -1.082                 | 3.851                  | -1.380                     | -8.944                 | -0.615                  |
| Arg57   | -4.443                  | -4.717                 | 1.939                  | -1.406                     | -3.641                 | 3.382                   |
| Glu69   | -4.255                  | -4.070                 | 0.643                  | -0.980                     | -1.501                 | 1.653                   |
| Cys67   | -3.632                  | -3.406                 | 7.750                  | -1.659                     | -6.159                 | -0.158                  |
| Gly62   | -3.215                  | -2.520                 | 1.025                  | -0.841                     | -2.058                 | 1.179                   |

Table S3. PIEDA of Onvansertib and PLK1 complex (PDB ID: 2YAC). All energies are in kcal/mol. The calculation was conducted at the FMO-MP2/6-31G\*\*/PCM level.

| Residue | $\Delta E^{\text{int}}$ | $\Delta E^{\text{es}}$ | $\Delta E^{\text{ex}}$ | $\Delta E^{\text{et+mix}}$ | $\Delta E^{\text{di}}$ | $\Delta G_{\text{sol}}$ |
|---------|-------------------------|------------------------|------------------------|----------------------------|------------------------|-------------------------|
| Glu140  | -49.684                 | -103.375               | 6.591                  | -5.569                     | -7.408                 | 60.077                  |
| Lys82   | -15.799                 | 10.706                 | 4.323                  | -2.501                     | -5.047                 | -23.280                 |
| Phe183  | -12.410                 | -5.963                 | 5.979                  | -2.432                     | -12.102                | 2.108                   |
| Arg134  | -11.929                 | 7.329                  | 5.507                  | -2.883                     | -5.345                 | -16.537                 |
| Leu132  | -10.461                 | -8.495                 | 3.117                  | -2.183                     | -5.025                 | 2.125                   |
| Cys133  | -9.000                  | -5.721                 | 8.138                  | -2.091                     | -6.214                 | -3.112                  |
| Gly60   | -7.029                  | -12.922                | 2.082                  | -1.577                     | -3.544                 | 8.932                   |
| Asn181  | -6.527                  | -16.009                | 1.011                  | -0.727                     | -2.013                 | 11.211                  |
| Leu59   | -6.407                  | 0.597                  | 3.488                  | -1.644                     | -8.014                 | -0.834                  |
| Asp194  | -5.387                  | -39.078                | 3.136                  | -2.553                     | -4.270                 | 37.378                  |
| Arg136  | -5.031                  | 40.183                 | 6.361                  | -3.800                     | -8.770                 | -39.005                 |
| Ser137  | -4.245                  | -0.214                 | 1.983                  | -0.862                     | -4.377                 | -0.775                  |
| Cys67   | -3.444                  | -2.285                 | 13.220                 | -3.305                     | -8.658                 | -2.416                  |
| Arg57   | -3.129                  | 23.939                 | 0.892                  | -1.095                     | -1.710                 | -25.155                 |

Table S4. PIEDA of GSK461364 and PLK1 complex. All energies are in kcal/mol. The calculation was conducted at the FMO-MP2/6-31G\*\*/PCM level.

| Residue | $\Delta E^{\text{int}}$ | $\Delta E^{\text{es}}$ | $\Delta E^{\text{ex}}$ | $\Delta E^{\text{ct+mix}}$ | $\Delta E^{\text{di}}$ | $\Delta G_{\text{sol}}$ |
|---------|-------------------------|------------------------|------------------------|----------------------------|------------------------|-------------------------|
| Glu140  | -56.329                 | -120.777               | 13.802                 | -6.773                     | -8.460                 | 65.879                  |
| Lys082  | -12.529                 | 0.356                  | 10.821                 | -2.931                     | -6.761                 | -14.014                 |
| Phe183  | -10.389                 | -8.297                 | 6.331                  | -1.926                     | -10.167                | 3.670                   |
| Cys133  | -10.248                 | -3.916                 | 1.592                  | -0.251                     | -3.187                 | -4.486                  |
| Asp194  | -9.998                  | -38.054                | 5.523                  | -3.781                     | -5.619                 | 31.933                  |
| Asn181  | -5.220                  | -12.858                | 0.545                  | -0.737                     | -2.068                 | 9.898                   |
| Leu059  | -4.066                  | 0.449                  | 2.725                  | -1.095                     | -5.254                 | -0.891                  |
| Gly060  | -3.419                  | -12.033                | 0.704                  | -0.310                     | -2.527                 | 10.747                  |

Table S5. PIEDA of KBJK557 and PLK1 complex. All energies are in kcal/mol. The calculation was conducted at the FMO-MP2/6-31G\*\*/PCM level.

| Residue | $\Delta E^{\text{int}}$ | $\Delta E^{\text{es}}$ | $\Delta E^{\text{ex}}$ | $\Delta E^{\text{ct+mix}}$ | $\Delta E^{\text{di}}$ | $\Delta G_{\text{sol}}$ |
|---------|-------------------------|------------------------|------------------------|----------------------------|------------------------|-------------------------|
| His538  | -25.291                 | -83.443                | 8.239                  | -4.695                     | -5.607                 | 54.608                  |
| Lys540  | -23.556                 | -94.849                | 3.000                  | -3.492                     | -4.191                 | 71.785                  |
| Trp414  | -21.232                 | -28.843                | 14.597                 | -5.024                     | -10.169                | -1.962                  |
| Asp416  | -10.779                 | 14.983                 | 6.886                  | -1.928                     | -4.024                 | -30.720                 |
| Tyr485  | -8.698                  | -5.375                 | 4.851                  | -1.775                     | -5.641                 | -6.399                  |
| Tyr417  | -7.744                  | -2.724                 | 4.970                  | -2.397                     | -8.491                 | -7.593                  |
| Leu490  | -7.455                  | -2.355                 | 6.972                  | -2.204                     | -9.725                 | -9.868                  |
| Val415  | -6.996                  | -1.849                 | 3.192                  | -2.662                     | -4.504                 | -5.677                  |
| Leu491  | -5.033                  | -7.018                 | 1.092                  | -0.442                     | -3.068                 | 1.335                   |
| Phe535  | -3.763                  | 2.863                  | 5.310                  | -2.895                     | -5.023                 | -9.041                  |



Table S6. PIEDA of KBJK-4a and PLK1 complex. All energies are in kcal/mol. The calculation was conducted at the FMO-MP2/6-31G\*\*/PCM level.

| Residue | $\Delta E^{\text{int}}$ | $\Delta E^{\text{es}}$ | $\Delta E^{\text{ex}}$ | $\Delta E^{\text{ct+mix}}$ | $\Delta E^{\text{di}}$ | $\Delta G_{\text{sol}}$ |
|---------|-------------------------|------------------------|------------------------|----------------------------|------------------------|-------------------------|
| His538  | -34.010                 | -110.056               | 21.855                 | -7.675                     | -6.445                 | 68.311                  |
| Trp414  | -16.658                 | -21.122                | 13.368                 | -4.167                     | -11.114                | 6.377                   |
| Lys540  | -10.549                 | -59.446                | 2.091                  | -2.631                     | -2.826                 | 52.263                  |
| Leu490  | -7.450                  | -3.407                 | 7.553                  | -2.552                     | -10.104                | 1.060                   |
| Phe535  | -4.603                  | -0.517                 | 1.522                  | -2.381                     | -3.560                 | 0.333                   |
| Asp416  | -4.029                  | 19.404                 | 5.679                  | -2.193                     | -3.998                 | -22.921                 |
| Thr539  | -3.637                  | -4.309                 | 0.006                  | 0.143                      | -0.185                 | 0.708                   |
| Val415  | -3.564                  | 2.558                  | 1.164                  | -1.512                     | -3.257                 | -2.517                  |
| Tyr485  | -3.540                  | -0.696                 | 2.877                  | -0.921                     | -3.650                 | -1.150                  |
| Leu491  | -3.347                  | -6.077                 | 0.665                  | 0.669                      | -2.375                 | 3.771                   |

Table S7. List of PDB IDs of protein structures used in this paper.

| Entry | PDB ID | PLK1 domain | Ligands     | Resolution (Å) |
|-------|--------|-------------|-------------|----------------|
| 1     | 2OU7   | KD          | ATP         | 2.4            |
| 2     | 3FC2   | KD          | Volasertib  | 2.45           |
| 3     | 2RKU   | KD          | BI2536      | 1.95           |
| 4     | 4J52   | KD          | TAK-18      | 2.3            |
| 5     | 4J53   | KD          | TAK-960     | 2.5            |
| 6     | 5TA6   | KD          | Compound 15 | 2.5            |
| 7     | 5TA8   | KD          | Compound 11 | 2.6            |
| 8     | 2YAC   | KD          | Onvansertib | 2.2            |
| 9     | 3KB7   | KD          | Compound 49 | 2.5            |
| 10    | 3THB   | KD          | MLN0905     | 2.5            |
| 11    | 4A4O   | KD          | Compound 13 | 2.7            |
| 12    | 4A4L   | KD          | Compound 25 | 2.35           |
| 13    | 3P37   | PBD         | FDPPLHSpTA  | 2.38           |
| 14    | 3RQ7   | PBD         | 4j          | 1.55           |

KD: kinase domain

PBD: polo-box domain
